# Supplementary material
Source: PubMed Central journal article supplement (PMC6355484)
Supplement: 2018_196568-Disclosures_and_Contributions.pdf [file 2018_196568-Disclosures_and_Contributions.pdf]

Haematologica  
HAEMATOL/2018/196568  
Version 5

Bone marrow mesenchymal stem/stromal cells from risk-stratified acute myeloid leukemia patients are anti-inflammatory in in vivo preclinical models of hematopoietic reconstitution and severe colitis

Rafael Díaz de la Guardia, Belen Lopez-Millan, Heleia Roca-Ho, Clara Bueno, Francisco Gutiérrez-Agüera, Jose Luis Fuster, Eduardo Anguita, Samanta Romina Zanetti, Susana Vives, Josep Nomdedeu, Robert Sackstein, Jessie Lavoie, Elena González-Rey, Mario Delgado, Michael Rosu-Myles, and Pablo Menendez

Disclosures: None

Contributions: RDdG, BLM, HR and MD conceived the study, designed and performed experiments, and analyzed data. RDdG, BLM, MR-M and PM conceived the study and wrote the manuscript. CB, FG, SZ, EG-R performed experiments and analyzed data. JLF, EA, SV, JN, RS, JV, MR-M provided clinical samples, and contributed intellectually and financially.
